# Supplementary material for: Acute effects of leptin require PI3K signaling in hypothalamic proopiomelanocortin neurons in mice
Source: JCI journal article supplement (doi:10.1172/jci32964), 2008-04-10
Supplement: sd1 [file 1]

# Supplemental Table 1

|                                                  | Size (pF)  | Vm (mV)     | Firing (Hz) | Input Resistance (MΩ) |
|--------------------------------------------------|------------|-------------|-------------|-----------------------|
| <b>Wildtype</b>                                  | 13.8 ± 0.5 | -4 .7 ± 0.8 | 1.2 ± 0.1   | 879 .3 ± 9 .47        |
| <b><i>pik3r1 POMCKO</i></b>                      | 13.3 ± 0.9 | -4 .1 ± 1.2 | 1.3 ± 0.2   |                       |
| <b><i>pik3r1 POMCKO</i><br/><i>pik3r2-/-</i></b> | 12.7 ± 0.5 | -4 .7 ± 1.6 | 1.3 ± 0.1   | 1050 ± 102 .5         |

## Supplemental Figure 1

a.

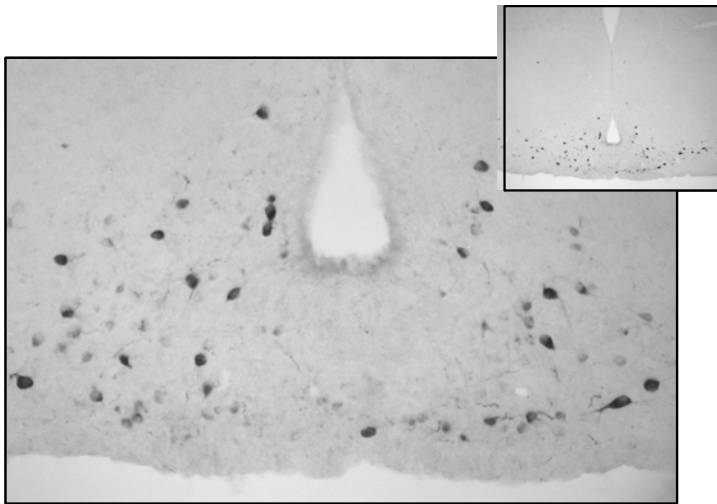

b.

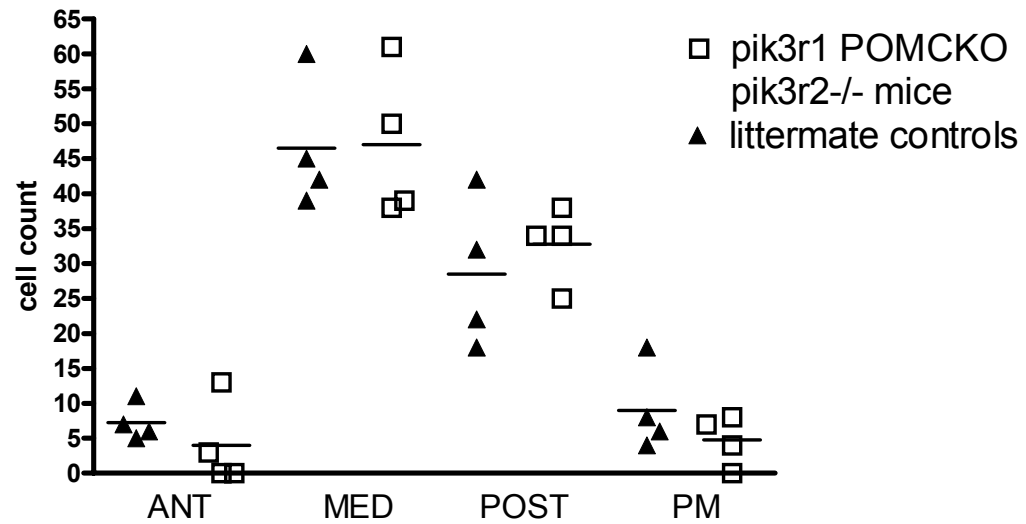

## Supplemental Figure 2

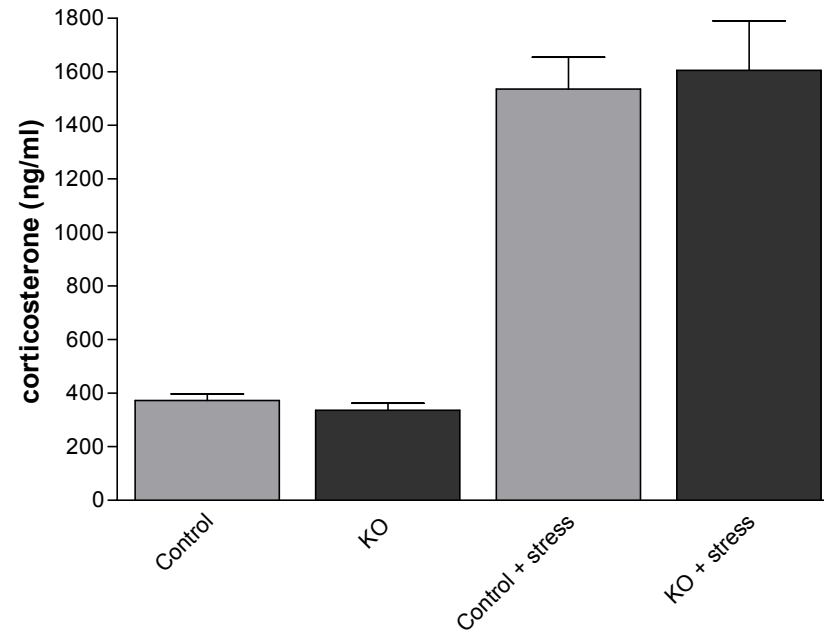

### Supplemental Figure 3

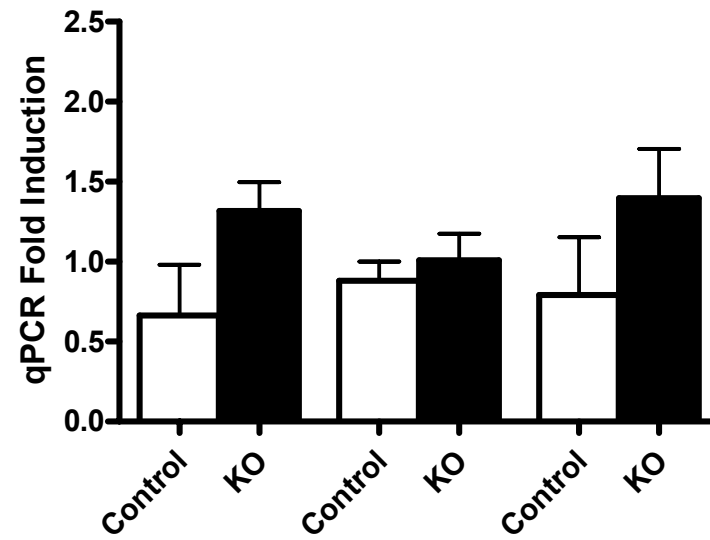

Supplemental Figure 1. POMC cell morphology and numbers are similar in control and *pik3r1 POMCKO pik3r2<sup>-/-</sup>* hypothalami. (A) Immunohistochemical stain for  $\beta$ -endorphin in a *pik3r1 POMCKO pik3r2<sup>-/-</sup>* medial hypothalamus. (B) POMC cell counts in *pik3r1 POMCKO pik3r2<sup>-/-</sup>* (open squares) and littermate controls lacking POMC-cre expression (filled triangles) in mouse hypothalami at four levels (n=4).  $\beta$ -endorphin staining cells were counted on a single side per section. ANT = Bregma -2.3 mm, Interaural 6.7 mm, MED = Bregma -3.14 mm, Interaural 5.86 mm, POST = Bregma -3.8 mm, Interaural 5.2 mm, PM (premamillary) = Bregma -4.52 mm, Interaural 4.48 mm.

Supplemental Figure 2. Normal corticosterone secretion in *pik3r1 POMCKO pik3r2<sup>-/-</sup>* mice. (A) Corticosterone levels (ng/ml) of male littermate control (n = 6) and *pik3r1 POMCKO pik3r2<sup>-/-</sup>* mice (n = 8) were studied under basal conditions after three days of individual housing. (B) Corticosterone levels in male mice after 30 minutes of housing with novel males. Difference between basal and stressed:  $p < 0.0001$  for both groups. No significant difference exists between the *pik3r1 POMCKO pik3r2<sup>-/-</sup>* mice and littermate controls under either condition. Data are given as mean  $\pm$  SEM.

Supplemental Figure 3. Hypothalamic neuropeptide expression in young mice. (B) NPY, AgRP and POMC expression in hypothalami from 8 week old male control or *pik3r1 POMCKO pik3r2<sup>-/-</sup>* mice (n = 4) as measured by qPCR.
